# Supplementary material for: Nanostructured IrOx supported on N-doped TiO2 as an efficient electrocatalyst towards acidic oxygen evolution reaction
Source: Royal Society of Chemistry journal article supplement (doi:10.1039/d2ra05374h), 2022-01-01
Supplement: d2ra05374h1.pdf [file d2ra05374h1.pdf]

Electronic Supplementary Information (ESI)

**Nanostructured IrO<sub>x</sub> supported on N-doped TiO<sub>2</sub> as an efficient electrocatalyst towards acidic oxygen evolution reaction**

Guoqiang Li,<sup>\*a</sup> Hongrui Jia,<sup>a</sup> Huan Liu,<sup>b</sup> Xin Yang,<sup>a</sup> Meng-Chang Lin<sup>a</sup>

<sup>a</sup> College of Energy Storage Technology, Shandong University of Science and Technology, Qingdao 266590, China

<sup>b</sup> Qingdao Institute of Bioenergy and Bioprocess Technology, Chinese Academy of Sciences, Qingdao 266101, China

\* E-mail: ligq@sdust.edu.cn

## 1. Experimental Section

### 1.1 Materials

$\text{H}_2\text{IrCl}_6 \cdot x\text{H}_2\text{O}$ ,  $\text{TiO}_2$  and hexadecyl trimethyl ammonium bromide (CTAB) were purchased from Aladdin Co., Ltd. Ethylene glycol (EG), isopropyl alcohol, ethanol and  $\text{H}_2\text{SO}_4$  were purchased from Beijing Chemical Co. High-purity  $\text{NH}_3$  gas was purchased from Ludong Gas Co. 5 wt% Nafion® solution and Nafion® 115 membrane were purchased from DuPont Co. Carbon paper was purchased from Toray Co. Commercial  $\text{IrO}_2$  denoted as  $\text{IrO}_2(\text{CM})$  was purchased from Alfa Aesar Chemical Co., Ltd. Commercial Pt/C (20 wt%Pt) denoted as Pt/C(CM) was purchased from Johnson Matthey Company. Commercial F- $\text{SnO}_2$  (FTO) conductive glass was purchased from the NSG Co., Ltd., the thickness is 1.1 mm, and the square resistance is  $10 \Omega$ . All solutions used were modulated using Millipore-MiliQ water (resistivity:  $\rho > 18 \text{ M}\Omega \cdot \text{cm}$ ).

### 1.2 Catalysts preparation

The  $\text{TiO}_2$  powder was placed in a tubular oven and then heated to  $500 \text{ }^\circ\text{C}$  with the heating rate of  $5 \text{ }^\circ\text{C min}^{-1}$  and maintained for 2 h in a flowing  $\text{NH}_3$  atmosphere. After naturally cooling to room temperature, N-doped  $\text{TiO}_2$  (denoted as N- $\text{TiO}_2$ ) was obtained.

The  $\text{IrO}_x/\text{N-TiO}_2$  electrocatalyst was synthesized through refluxing reduction method, in which ethylene glycol (EG) and hexadecyl trimethyl ammonium bromide (CTAB) act as the reducing and dispersing agents, respectively. At first, 50 mg N- $\text{TiO}_2$  and a certain amount of CTAB ( $n_{\text{CTAB}} : n_{\text{Ir}} = 3:1$ ) were ultrasonically dispersed in EG solution for 1 h. Then, 5 mL  $\text{H}_2\text{IrCl}_6 \cdot x\text{H}_2\text{O}$  solution (10 mg Ir per 1 mL EG) was added, and stirred for 2 h at room temperature. Subsequently, the mixture was transferred to oil bath to react at  $160 \text{ }^\circ\text{C}$  for 3 h. Finally, the catalyst was obtained through centrifuged with deionized water, and dried at  $60 \text{ }^\circ\text{C}$  in the oven over night. Meanwhile,  $\text{IrO}_x/\text{TiO}_2$  and  $\text{IrO}_x$  counterparts were synthesized through the similar procedure.

### 1.3 Physical characterizations

The electrical conductivity was measured using the four-point probe measurement (RTS-8, China), the sheet samples were prepared through a tablet machine (MRX-YP180, China). The crystal structure was investigated by X-ray diffraction (XRD) measurement using D8-Advance X-ray diffractometer (BRUKER Company, Germany) with the Cu K $\alpha$  (1.5405 Å) as radiation source operating at 40 kV and 200 mA. The morphology feature was researched with transmission electron microscopy (TEM), high-resolution TEM (HRTEM), high-angle annular dark-field scanning TEM (HAADF-STEM), elemental mapping analysis and energy-dispersive X-ray spectroscopy (EDX) (FEI Company, USA). The surface information was proved by X-ray photoelectron spectroscopy (XPS) spectrometer (Kratos Ltd. XSAM-800, UK) with Al K $\alpha$  monochromatic source. The electrochemically dissolved quantity of Ir during the stability test was determined by inductively coupled plasma optical emission spectroscopy (ICP-OES).

#### 1.4 Electrochemical measurements

Electrochemical measurements were firstly performed with three-electrode setup operated on Princeton Applied Research Model273 Potentiostat/Galvanostat. Glassy carbon (GC, 3 mm diameter) electrode was used as the working electrode substrate, saturated calomel electrode (Hg/Hg<sub>2</sub>Cl<sub>2</sub>; SCE) and Pt plate were used as the reference and counter electrode, respectively. The electrolyte solution was 0.5 mol L<sup>-1</sup> (0.5 M) H<sub>2</sub>SO<sub>4</sub> purged with high-purity N<sub>2</sub>. All the potentials were calibrated with the reversible hydrogen electrode (RHE) that  $E(\text{RHE}) = E(\text{SCE}) + 0.242 \text{ V} + 0.059 \cdot \text{pH}$ . The working electrode was prepared as follows: 3 mg of the catalyst was firstly ultrasonically dispersed in 315  $\mu\text{L}$  solutions containing of 15  $\mu\text{L}$  Nafion® solution and 300  $\mu\text{L}$  ethanol solution for 30 min. Then, 2.23  $\mu\text{L}$  catalyst inks was pipetted and spread on the glassy carbon substrate. Finally, the working electrode was obtained after the solvent volatilized with the catalyst loading was 0.3 mg cm<sup>-2</sup>.

The outer charge ( $Q_{\text{outer}}$ ) was calculated from the cyclic voltammetry (CV) curves (0-1.50 V) obtained at the scanning rate of 300 mV s<sup>-1</sup>, E was selected with the potential window between 0.70 and 1.40 V.

Linear sweep voltammetry (LSV) curves were recorded in the potential window

ranged from 1.10 to 1.70 V at the scanning rate of 5 mV s<sup>-1</sup>. All data were corrected for 95% *iR* potential drop, and *R* is the solution resistance. The EIS measurements were applied in the frequency range of 0.1 Hz to 10 kHz at the potential of 1.55 V. The galvanostatic tests at the constant current density of 10 mA cm<sup>-2</sup> for 10 h in N<sub>2</sub>-saturated 0.5 M H<sub>2</sub>SO<sub>4</sub> solution were measured by employing F-SnO<sub>2</sub> conductive glass (FTO, 1\*2 cm) as the working electrode substrate, the catalyst loading was also 0.3 mg cm<sup>-2</sup>.

Two-electrode overall water splitting tests were performed with IrO<sub>x</sub>/N-TiO<sub>2</sub>, IrO<sub>x</sub> or IrO<sub>2</sub>(CM) as the anode catalyst, and Pt/C(CM) as the cathode catalyst. FTO (1\*2 cm) was used as the working electrode substrate. The anode catalyst loading was 0.3 mg cm<sup>-2</sup>, and the cathode catalyst loading was 0.1 mg cm<sup>-2</sup>. LSV experiments were performed with a voltage window ranged from 1.0 to 2.0 V at the scanning rate of 5 mV s<sup>-1</sup> in 0.5 M H<sub>2</sub>SO<sub>4</sub> at room temperature. The galvanostatic tests were performed at the constant current density of 10 mA cm<sup>-2</sup> for 20 h.

### **1.5 Performance evaluation of the PEMWE single cell**

SPEWE here can be depicted as proton exchange membrane water electrolysis (PEMWE) by using Nafion proton exchange membrane as the SPE. As the key component, membrane electrode assembly (MEA) of 12.5 cm<sup>2</sup> was fabricated by anode catalyst (IrO<sub>x</sub>/N-TiO<sub>2</sub> or IrO<sub>2</sub>(CM)), anode diffusion layer (Ti mesh of 4 cm diameter), cathode catalyst (Pt/C(CM)), cathode diffusion layer (carbon paper), and Nafion® 115 membrane. Specifically, the catalyst slurry was firstly prepared through mixing the catalyst powder, Nafion® solution, isopropyl alcohol and deionized water. Subsequently, the catalyst slurry was ultrasonically sprayed onto each side of membrane to form catalyst coated membrane (CCM) electrode, the anode and cathode catalyst loadings were 2.0 and 1.0 mg cm<sup>-2</sup>, respectively. Finally, CCM was hot pressed with the anode-cathode diffusion layers at 120 °C and 2 MPa for 1 min. SPE water electrolysis single cell was assembled with the prepared MEA and other component such as bipolar plate, end plate, seal framework, etc. Deionized water was pumped into the anode side with the flow rate of 50 cc min<sup>-1</sup>, then the single cell was connected to the Arbin battery testing instrument. The steady-state polarization tests

were performed at the water temperature of 80 °C, with the increasing current density from 0.02 to 2.0 A cm<sup>-2</sup>. The stability test were performed in galvanostatic mode with the constant current densities of 0.5 and 2.0 A·cm<sup>-2</sup> for 300 h, respectively.

## 2. Supplementary Figures and Tables

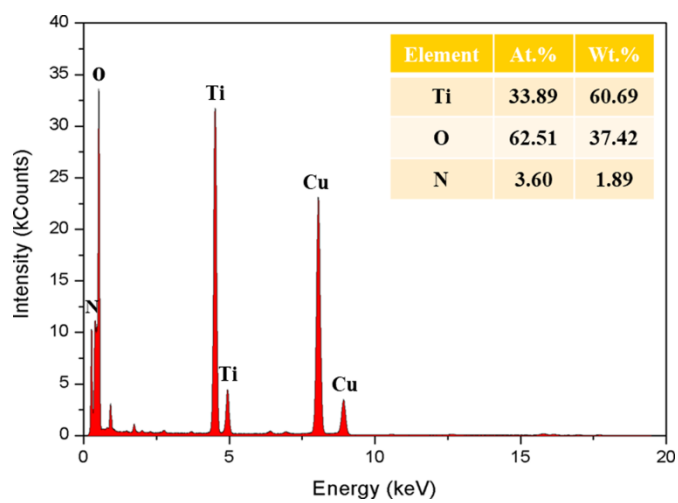

**Fig. S1** EDX spectrum and element content of N-TiO<sub>2</sub>.

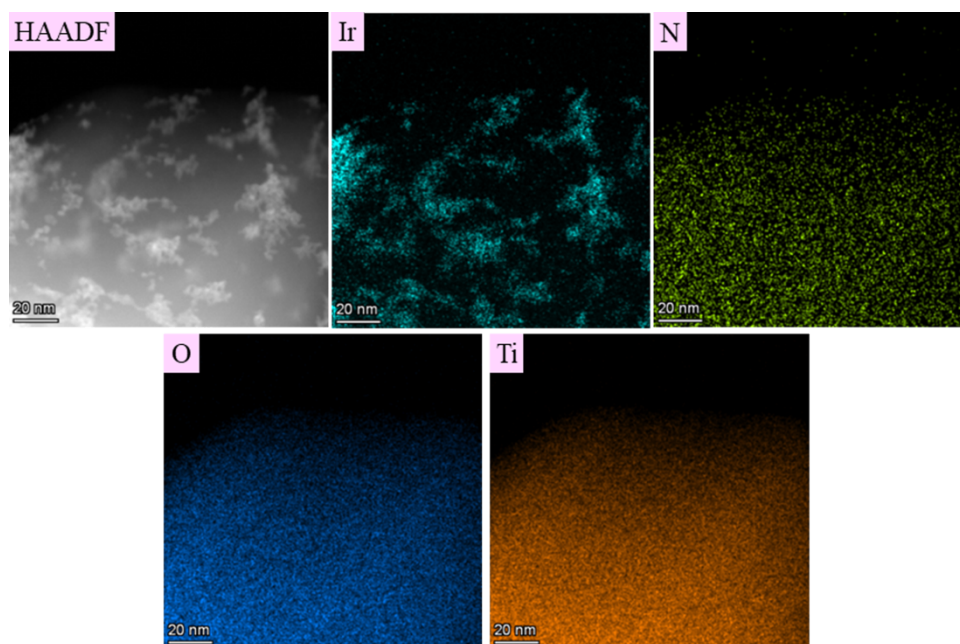

**Fig. S2** HAADF-STEM and corresponding elemental mapping images of IrO<sub>x</sub>/N-TiO<sub>2</sub>.

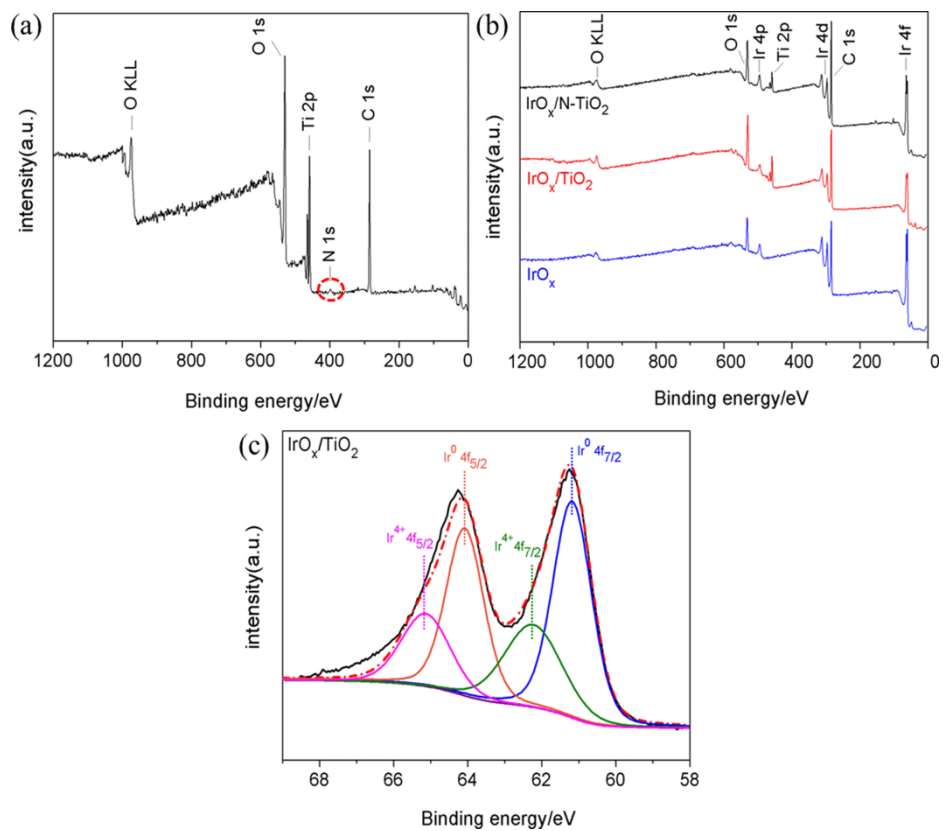

**Fig. S3** (a) XPS survey spectrum for N-TiO<sub>2</sub>. (b) XPS survey spectra for the catalysts. (c) High-resolution XPS spectra of the deconvoluted Ir 4f for IrO<sub>x</sub>/TiO<sub>2</sub>.

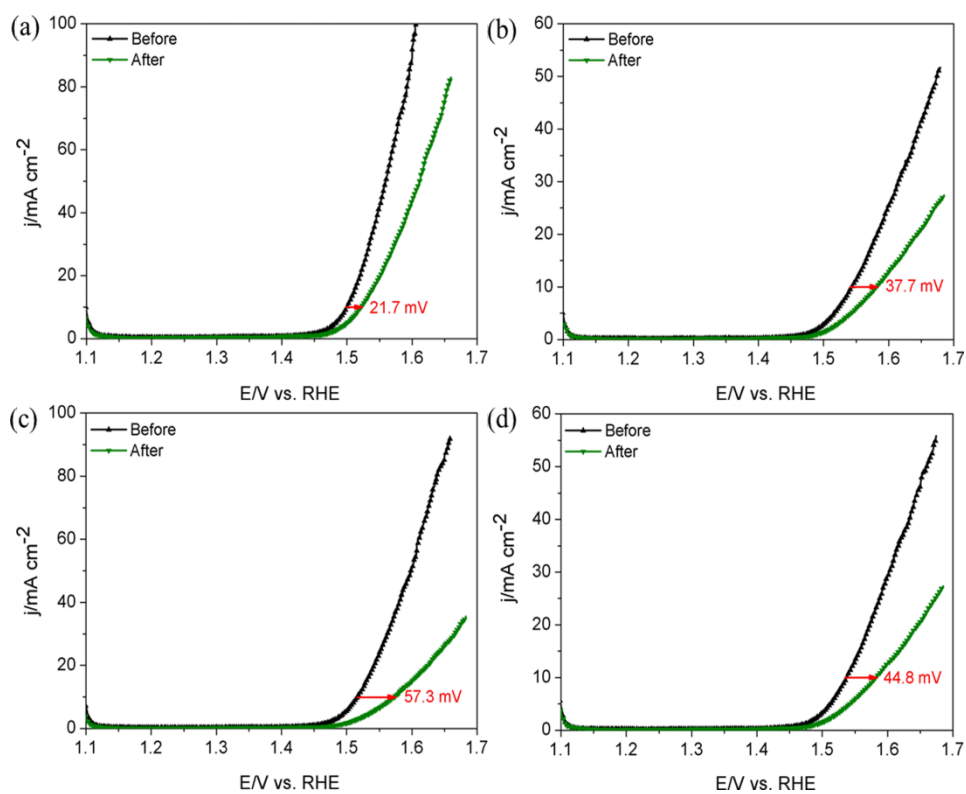

**Fig. S4** LSV curves before and after the stability tests of (a) IrO<sub>x</sub>/N-TiO<sub>2</sub>, (b) IrO<sub>x</sub>/TiO<sub>2</sub>, (c) IrO<sub>x</sub> and (d) IrO<sub>2</sub>(CM) at the scanning rate of 5 mV s<sup>-1</sup> in N<sub>2</sub>-saturated 0.5 M H<sub>2</sub>SO<sub>4</sub> at room temperature.

**Table S1** XPS analysis of the catalysts.

| Catalyst                             | Binding energy (Ir 4f <sub>7/2</sub> ; eV) | Relative content (%) of Ir species |                  |
|--------------------------------------|--------------------------------------------|------------------------------------|------------------|
|                                      |                                            | Ir <sup>0</sup>                    | Ir <sup>4+</sup> |
| IrO <sub>x</sub> /N-TiO <sub>2</sub> | 61.10                                      | 66.1%                              | 33.9%            |
| IrO <sub>x</sub> /TiO <sub>2</sub>   | 61.26                                      | 64.1%                              | 35.9%            |
| IrO <sub>x</sub>                     | 61.34                                      | 63.2%                              | 36.8%            |



**Table S2** The comparison of the overpotential for IrO<sub>x</sub>/N-TiO<sub>2</sub> with reported supported Ir-based electrocatalysts for acidic OER.

| Catalyst                                                               | Loading<br>(mg cm <sup>-2</sup> )                        | Electrolyte                              | Scanning<br>rate<br>(mV/s) | Current<br>density<br>(j, mA<br>cm <sup>-2</sup> ) | Overpotential<br>(mV vs.<br>RHE)@j | References |
|------------------------------------------------------------------------|----------------------------------------------------------|------------------------------------------|----------------------------|----------------------------------------------------|------------------------------------|------------|
| IrO <sub>x</sub> /N-TiO <sub>2</sub>                                   | 0.3                                                      | 0.5 M<br>H <sub>2</sub> SO <sub>4</sub>  | 5                          | 1                                                  | 195                                | This work  |
|                                                                        |                                                          |                                          |                            | 10                                                 | 270                                |            |
| Ir@TiO <sub>2</sub>                                                    | 0.37                                                     | 0.5 M<br>H <sub>2</sub> SO <sub>4</sub>  | 5                          | 10                                                 | 220                                | 1          |
| IrO <sub>2</sub> /TiO <sub>2</sub>                                     | 0.2<br>mg <sub>IrO<sub>2</sub></sub><br>cm <sup>-2</sup> | 0.5 M<br>H <sub>2</sub> SO <sub>4</sub>  | 1                          | 12                                                 | 370                                | 2          |
| Ir/Ti <sub>4</sub> O <sub>7</sub>                                      | 0.133                                                    | 0.5 M<br>H <sub>2</sub> SO <sub>4</sub>  | 5                          | 10                                                 | ~340                               | 3          |
| IrO <sub>2</sub> /Nb <sub>0.05</sub> Ti <sub>0.95</sub> O <sub>2</sub> | 0.255                                                    | 0.5 M<br>H <sub>2</sub> SO <sub>4</sub>  | 5                          | 1                                                  | 270                                | 4          |
| IrO <sub>2</sub> /Nb-TiO <sub>2</sub>                                  | 0.23                                                     | 0.1 M<br>HClO <sub>4</sub>               | 5                          | 10                                                 | ~310                               | 5          |
| IrO <sub>2</sub> @Ir/TiN                                               | 0.379                                                    | 0.5 M<br>H <sub>2</sub> SO <sub>4</sub>  | 5                          | 10                                                 | 265                                | 6          |
| TiN/IrO <sub>2</sub>                                                   | 0.255                                                    | 0.5 M<br>H <sub>2</sub> SO <sub>4</sub>  | 10                         | 10                                                 | 313                                | 7          |
| Ir/TiC                                                                 | 0.122                                                    | 0.1 M<br>HClO <sub>4</sub>               | 10                         | 10                                                 | >320 vs. SHE                       | 8          |
| Ir-ND/ATO                                                              | 0.0102<br>mg <sub>Ir</sub> cm <sup>-2</sup>              | 0.05 M<br>H <sub>2</sub> SO <sub>4</sub> | 5                          | 10                                                 | >370                               | 9          |
| IrO <sub>2</sub> /ATO                                                  | 0.2                                                      | 0.1 M<br>HClO <sub>4</sub>               | 5                          | 10                                                 | 256                                | 10         |
| IrO <sub>2</sub> /Sb-SnO <sub>2</sub> NW                               | 0.25                                                     | 0.5 M<br>H <sub>2</sub> SO <sub>4</sub>  | 1                          | 10                                                 | 8 vs. SCE                          | 11         |
| Ir <sub>0.5</sub> Ru <sub>0.5</sub> O <sub>2</sub> /ATO                | 0.8                                                      | 0.5 M<br>H <sub>2</sub> SO <sub>4</sub>  | 0.5                        | 1                                                  | 240                                | 12         |
| Ir/ITO                                                                 | 0.102<br>mg <sub>Ir</sub> cm <sup>-2</sup>               | 0.1 M<br>HClO <sub>4</sub>               | 25                         | 10                                                 | 340                                | 13         |
| IrO <sub>2</sub> /V <sub>2</sub> O <sub>5</sub>                        | 0.1 mg <sub>Ir</sub><br>cm <sup>-2</sup>                 | 0.5 M<br>H <sub>2</sub> SO <sub>4</sub>  | 1                          | 10                                                 | 266                                | 14         |

**Table S3** The comparison of the mass activity for IrO<sub>x</sub>/N-TiO<sub>2</sub> with reported supported Ir-based electrocatalysts for acidic OER.

| Catalyst                                                               | Loading<br>(mg cm <sup>-2</sup> )           | Electrolyte                              | Scanning<br>rate<br>(mV/s) | Potential<br>(V vs.<br>RHE) | Mass<br>activity<br>(A gr <sup>-1</sup> )            | References |
|------------------------------------------------------------------------|---------------------------------------------|------------------------------------------|----------------------------|-----------------------------|------------------------------------------------------|------------|
| IrO <sub>x</sub> /N-TiO <sub>2</sub>                                   | 0.3                                         | 0.5 M<br>H <sub>2</sub> SO <sub>4</sub>  | 5                          | 1.48                        | 29.4                                                 | This work  |
|                                                                        |                                             |                                          |                            | 1.50                        | 66.1                                                 |            |
|                                                                        |                                             |                                          |                            | 1.55                        | 278.7                                                |            |
|                                                                        |                                             |                                          |                            | 1.60                        | 597.7                                                |            |
| Ir@TiO <sub>2</sub>                                                    | 0.37                                        | 0.5 M<br>H <sub>2</sub> SO <sub>4</sub>  | 5                          | 1.50                        | 486                                                  | 1          |
| Ir/Ti <sub>4</sub> O <sub>7</sub>                                      | 0.133                                       | 0.5 M<br>H <sub>2</sub> SO <sub>4</sub>  | 5                          | 1.48                        | 4.2                                                  | 3          |
| IrO <sub>2</sub> /Nb <sub>0.05</sub> Ti <sub>0.95</sub> O <sub>2</sub> | 0.255                                       | 0.5 M<br>H <sub>2</sub> SO <sub>4</sub>  | 5                          | 1.60                        | 471 A<br>gr <sub>IrO<sub>2</sub></sub> <sup>-1</sup> | 4          |
| IrO <sub>2</sub> @Ir/TiN                                               | 0.379                                       | 0.5 M<br>H <sub>2</sub> SO <sub>4</sub>  | 5                          | 1.60                        | 480.4                                                | 6          |
| TiN/IrO <sub>2</sub>                                                   | 0.255                                       | 0.5 M<br>H <sub>2</sub> SO <sub>4</sub>  | 10                         | 1.60                        | 874 A<br>gr <sub>IrO<sub>2</sub></sub> <sup>-1</sup> | 7          |
| Ir/TiC                                                                 | 0.122                                       | 0.1 M<br>HClO <sub>4</sub>               | 10                         | 1.55                        | 150                                                  | 8          |
| Ir-ND/ATO                                                              | 0.0102<br>mg <sub>Ir</sub> cm <sup>-2</sup> | 0.05 M<br>H <sub>2</sub> SO <sub>4</sub> | 5                          | 1.51                        | 70                                                   | 9          |
|                                                                        |                                             |                                          |                            | 1.60                        | 135.8                                                |            |
| IrO <sub>2</sub> /ATO                                                  | 0.2                                         | 0.1 M<br>HClO <sub>4</sub>               | 5                          | 1.60                        | 120                                                  | 10         |
| Ir/ITO                                                                 | 0.102<br>mg <sub>Ir</sub> cm <sup>-2</sup>  | 0.1 M<br>HClO <sub>4</sub>               | 25                         | 1.48                        | 16                                                   | 13         |
| IrO <sub>2</sub> /V <sub>2</sub> O <sub>5</sub>                        | 0.1 mg <sub>Ir</sub><br>cm <sup>-2</sup>    | 0.5 M<br>H <sub>2</sub> SO <sub>4</sub>  | 1                          | 1.53                        | 287                                                  | 14         |
| Ir/ATO                                                                 | 0.203                                       | 0.5 M<br>H <sub>2</sub> SO <sub>4</sub>  | 0.167                      | 1.48 vs.<br>Ag/AgCl         | 845                                                  | 15         |
| IrO <sub>2</sub> /ATO                                                  | --                                          | 0.5 M<br>H <sub>2</sub> SO <sub>4</sub>  | 10                         | 1.53                        | 63                                                   | 16         |
| IrO <sub>2</sub> / meso-Sb-SnO <sub>2</sub>                            | 0.102                                       | 0.5 M<br>H <sub>2</sub> SO <sub>4</sub>  | 5                          | 1.60                        | 459.1                                                | 17         |

**Table S4**  $R_s$  and  $R_{ct}$  component values analyzed from the EIS tests.

| Catalyst                             | $R_s$ ( $\Omega$ ) | $R_{ct}$ ( $\Omega$ ) |
|--------------------------------------|--------------------|-----------------------|
| IrO <sub>x</sub> /N-TiO <sub>2</sub> | 5.5                | 14.5                  |
| IrO <sub>x</sub> /TiO <sub>2</sub>   | 5.8                | 35.3                  |
| IrO <sub>x</sub>                     | 5.7                | 20.6                  |
| IrO <sub>2</sub> (CM)                | 5.7                | 33.4                  |

## References

- (1) J. Y. Chen, S. Jayabal, D. S. Geng and X. Hu, *ChemistrySelect*, 2021, **6**, 9134-9138.
- (2) Z. X. Lu, Y. Shi, C. F. Yan and C. Q. Guo, *Int. J. Hydrogen Energy*, 2017, **42**, 3572-3578.
- (3) L. Wang, P. Lettenmeier, U. Golla-Schindler, P. Gazdzicki, N. A. Cañas, T. Morawietz, R. Hiesgen, S. S. Hosseiny, A. S. Gago and K. A. Friedrich, *Phys. Chem. Chem. Phys.*, 2016, **18**, 4487-4495.
- (4) W. Hu, S. L. Chen and Q. H. Xia, *Int. J. Hydrogen Energy*, 2014, **39**, 6967-6976.
- (5) C. P. Hao, H. Lv, C. E. Mi, Y. K. Song and J. X. Ma, *ACS Sustainable Chem. Eng.*, 2016, **4**, 746-756.
- (6) G. Q. Li, K. Li, L. Yang, J. F. Chang, R. P. Ma, Z. J. Wu, J. J. Ge, C. P. Liu and W. Xing, *ACS Appl. Mater. Interfaces*, 2018, **10**, 38117-38124.
- (7) K. K. Zhang, W. S. Mai, J. Li, H. Wang, G. Q. Li and W. Hu, *J. Mater. Sci.*, 2020, **55**, 3507-3520.
- (8) R. E. Fuentes, H. R. Colón-Mercado and M. J. Martínez-Rodríguez, *J. Electrochem. Soc.*, 2013, **161**, F77-F82.
- (9) H-S. Oh, H. N. Nong, T. Reier, M. Gliech and P. Strasser, *Chem. Sci.*, 2015, **6**, 3321-3328.
- (10) S-B. Han, Y-H. Mo, Y-S. Lee, S-G. Lee, D-H. Park and K-W. Park, *Int. J. Hydrogen Energy*, 2020, **45**, 1409-1416.
- (11) G. Liu, J. Xu, Y. Wang and X. Wang, *J. Mater. Chem. A*, 2015, **3**, 20791-20800.
- (12) A. T. Marshall and R. G. Haverkamp, *Electrochim. Acta*, 2010, **55**, 1978-1984.

- (13) D. Lebedev and C. Copéret, *ACS Appl. Energy Mater.*, 2019, **2**, 196-200.
- (14) X. Zheng, M. Qin, S. Ma, Y. Chen, H. Ning, R. Yang, S. Mao and Y. Wang, *Adv. Sci.*, 2022, **9**, 2104636.
- (15) F. Karimi and B. A. Peppley, *Electrochim. Acta*, 2017, **246**, 654-670.
- (16) D. Böhm, M. Beetz, M. Schuster, K. Peters, A. G. Hufnagel, M. Döblinger, B. Böller, T. Bein and D. Fattakhova-Rohlfing, *Adv. Funct. Mater.*, 2019, **30**, 1906670.
- (17) J. Tong, Y. Liu, Q. Peng, W. Hu and Q. Wu, *J. Mater. Sci.*, 2017, **52**, 13427-13443.
